# Supplementary material for: Low-temperature ALD/MLD growth of alucone and zincone thin films from non-pyrophoric precursors
Source: Royal Society of Chemistry journal article supplement (doi:10.1039/d2dt02279f), 2022-01-01
Supplement: d2dt02279f1.pdf [file d2dt02279f1.pdf]

## Electronic Supplementary Information (ESI)

### Low-temperature ALD/MLD growth of alucone and zincone thin films from non-pyrophoric precursors

Anish Philip<sup>a‡</sup>, Lukas Mai<sup>b‡</sup>, Ramin Ghiyasi<sup>a</sup>, Anjana Devi<sup>b\*</sup>, and Maarit Karppinen<sup>a\*</sup>

<sup>a</sup> *Department of Chemistry and Materials Science, Aalto University, FI-00076 Espoo, Finland*

<sup>b</sup> *Inorganic Materials Chemistry, Ruhr University Bochum, 44801 Bochum, Germany*

‡: *equal contribution*

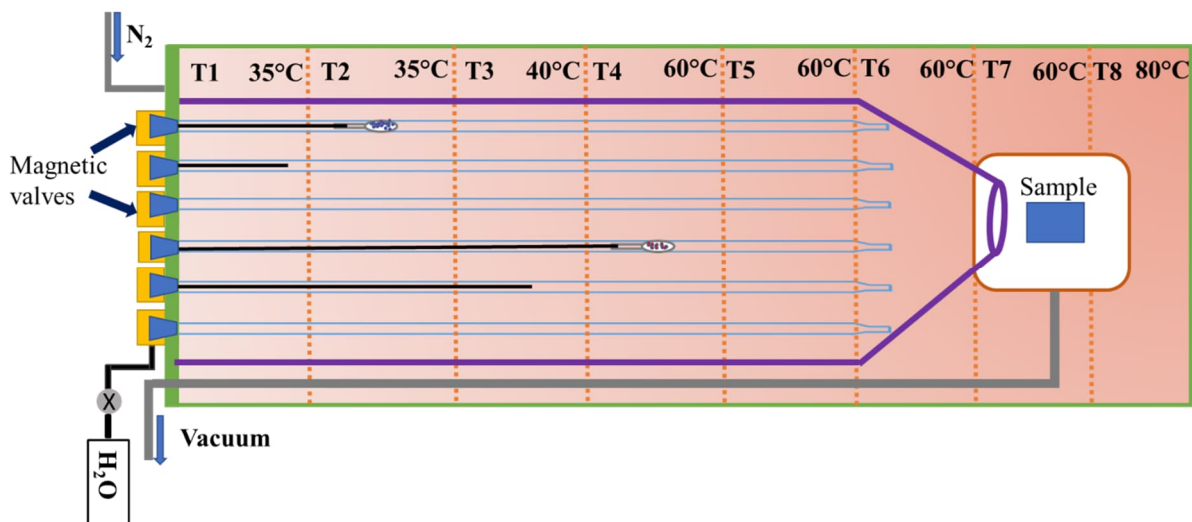

Fig. S1 Schematic diagram of the F-120 ALD reactor used. The temperature profile is demonstrated taking the deposition of Zn-HQ film as an example. Precursors [Zn(DMP)<sub>2</sub>] and HQ are placed in the T2 and T4 temperature zones, respectively.

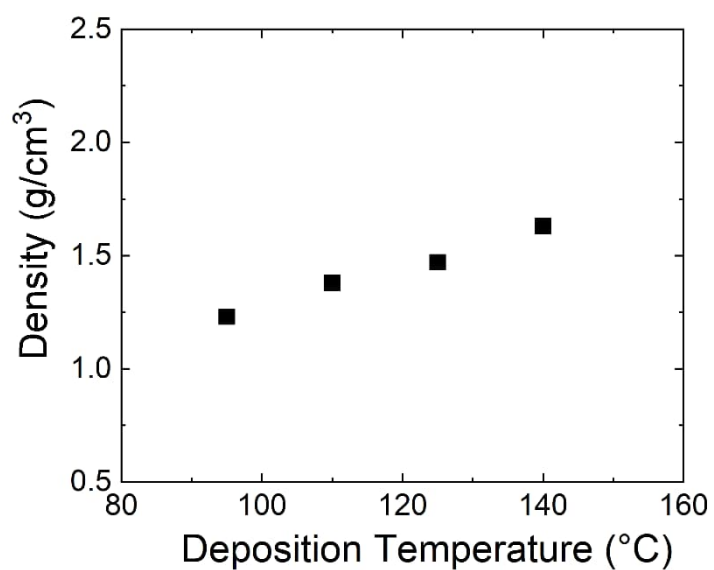

Fig.S2 Densities of Al-HQ films deposited at different temperatures.

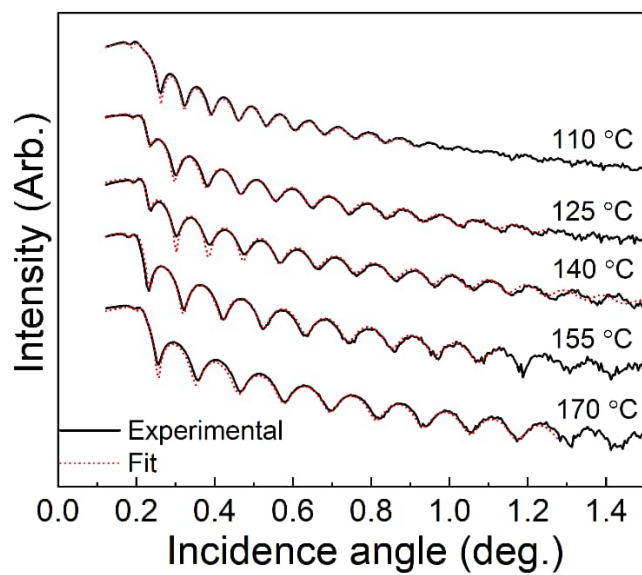

Fig. S3 Comparison of fitted and experimental XRR patterns for Al-HQ films deposited at different temperatures.

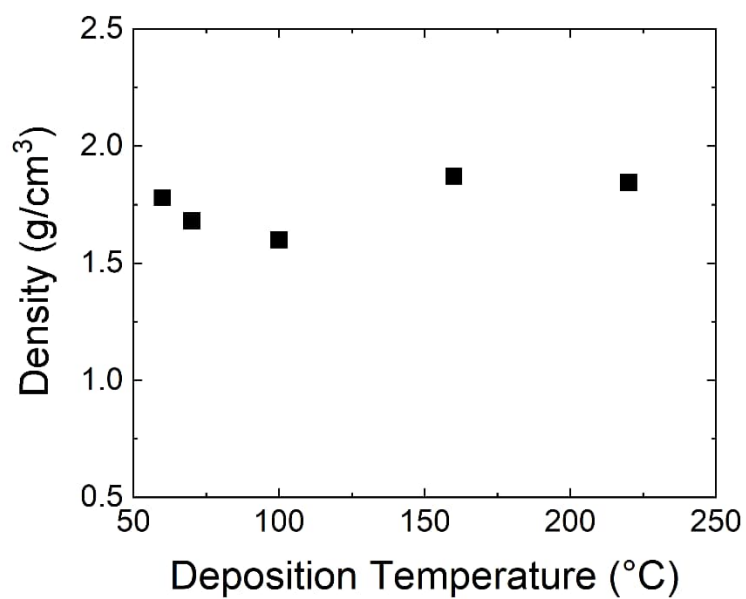

Fig. S4 Densities of Zn-HQ films deposited at different temperatures.

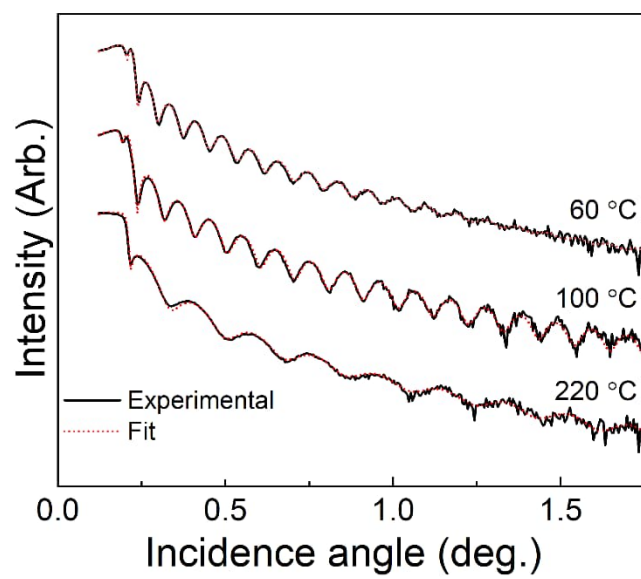

Fig. S5 Comparison of fitted and experimental XRR patterns for Zn-HQ films deposited at different temperatures.
